# Supplementary material for: Betacoronavirus Genomes: How Genomic Information has been Used to Deal with Past Outbreaks and the COVID-19 Pandemic
Source: MDPI journal article supplement (doi:10.3390/ijms21124546), 2020-06-26
Supplement: s1 [file s1]

**Table S1. Additional information on selected betacoronavirus genomes.**

| GenBank accession | Virus                                                   | Subgenus            | Isolate/strain                  | Host                            | Date published | Authors                                          |
|-------------------|---------------------------------------------------------|---------------------|---------------------------------|---------------------------------|----------------|--------------------------------------------------|
| AY686863          | SARS-CoV                                                | <i>Sarbecovirus</i> | A022                            | <i>Paguma larvata</i>           | 06/2004        | Xu et al.                                        |
| DQ011855          | Porcine hemagglutinating encephalomyelitis virus (PHEV) | <i>Embecovirus</i>  | VW572                           | <i>Sus scrofa</i>               | 04/2005        | Vijgen et al.                                    |
| DQ022305          | Bat SARS-like CoV HKU3                                  | <i>Sarbecovirus</i> | HKU3-1                          | <i>Rhinolophus sinicus</i>      | 04/2005        | Lau et al.                                       |
| KF367457          | Bat SARS-like CoV WIV1                                  | <i>Sarbecovirus</i> | WIV1                            | <i>Rhinolophus sinicus</i>      | 07/2013        | Ge et al.                                        |
| KF906249          | Dromedary CoV HKU23                                     | <i>Embecovirus</i>  | HKU23-265F                      | <i>Camelus dromedarius</i>      | 11/2013        | Woo et al.                                       |
| KF917527          | MERS-CoV                                                | <i>Merbecovirus</i> | MERS-CoV-Jeddah-Camel-1         | <i>Camelus dromedarius</i>      | 12/2013        | Azhar et al.                                     |
| MF593268          | <i>Neoromicia</i> bat CoV                               | <i>Merbecovirus</i> | Neoromicia/5038                 | <i>Neoromicia capensis</i>      | 07/2017        | Geldenhuys et al.                                |
| MG772933          | Bat SARS-like CoV SL-CoVZC45                            | <i>Sarbecovirus</i> | Bat-SL-CoVZC45                  | <i>Rhinolophus sinicus</i>      | 01/2018        | Hu et al.                                        |
| MG772934          | Bat SARS-like CoV SL-CoVZXC21                           | <i>Sarbecovirus</i> | Bat- SL-CoVZXC21                | <i>Rhinolophus sinicus</i>      | 01/2018        | Hu et al.                                        |
| MK907286          | Hedgehog CoV HKU31                                      | <i>Merbecovirus</i> | F6                              | <i>Erinaceus amurensis</i>      | 05/2019        | Lau et al.                                       |
| MN996532          | Bat SARS-like CoV RaTG13                                | <i>Sarbecovirus</i> | RaTG13                          | <i>Rhinolophus affinis</i>      | 01/2020        | Zhu et al.                                       |
| MT040333          | Pangolin CoV                                            | <i>Sarbecovirus</i> | PCoV_GX-P4L                     | <i>Manis javanica</i>           | 02/2020        | Cao et al.                                       |
| MT365033          | SARS-CoV-2                                              | <i>Sarbecovirus</i> | SARS-CoV-2/tiger/NY/040420/2020 | <i>Panthera tigris jacksoni</i> | 04/2020        | Mitchell et al.                                  |
| NC_003045         | Bovine CoV                                              | <i>Embecovirus</i>  | BCoV-ENT                        | <i>Bos taurus</i>               | 08/2001        | Chouljenko et al.                                |
| NC_004718         | SARS-CoV                                                | <i>Sarbecovirus</i> | Tor2                            | <i>Homo sapiens</i>             | 04/2003        | BCCA Genome Sciences Centre, Canada (Consortium) |
| NC_006213         | Human CoV OC43                                          | <i>Embecovirus</i>  | ATCC VR-759                     | <i>Homo sapiens</i>             | 03/2004        | St-Jean et al.                                   |
| NC_001846         | Mouse hepatitis virus (MHV)                             | <i>Embecovirus</i>  | MHV-A59                         | <i>Mus musculus</i>             | 10/1997        | Weiss et al.                                     |
| NC_006577         | Human CoV HKU1                                          | <i>Embecovirus</i>  | HKU1                            | <i>Homo sapiens</i>             | 04/2004        | Woo et al.                                       |
| NC_009019         | <i>Tylonycteris</i> bat CoV HKU4                        | <i>Merbecovirus</i> | HKU4-1 B04f                     | <i>Tylonycteris</i> sp.         | 10/2006        | Woo et al.                                       |

|           |                                  |                     |                |                               |         |                     |
|-----------|----------------------------------|---------------------|----------------|-------------------------------|---------|---------------------|
| NC_009020 | <i>Pipistrellus</i> bat CoV HKU5 | <i>Merbecovirus</i> | HKU5-1 LMH03f  | <i>Pipistrellus</i> sp.       | 10/2006 | Woo et al.          |
| NC_009021 | <i>Rousettus</i> bat CoV HKU9    | <i>Nobecovirus</i>  | HKU9-1 BF_005I | <i>Rousettus</i> sp.          | 10/2006 | Woo et al.          |
| NC_012936 | Rat CoV Parker                   | <i>Embecovirus</i>  | Parker         | <i>Rattus norvegicus</i>      | 04/2009 | Spiro et al.        |
| NC_019843 | MERS-CoV                         | <i>Merbecovirus</i> | EMC/2012       | <i>Homo sapiens</i>           | 10/2012 | van Boheemen et al. |
| NC_025217 | Bat Hp-BetaCoV Zhejiang2013      | <i>Hibecovirus</i>  | Zhejiang2013   | <i>Hipposideros pratti</i>    | 09/2013 | Wu et al.           |
| NC_026011 | China <i>Rattus</i> CoV HKU24    | <i>Embecovirus</i>  | HKU24-R050051  | <i>Rattus norvegicus</i>      | 08/2014 | Lau et al.          |
| NC_030886 | <i>Rousettus</i> bat CoV GCCDC1  | <i>Nobecovirus</i>  | GCCDC1 356     | <i>Rousettus leschenaulti</i> | 02/2006 | Huang et al.        |
| NC_045512 | SARS-CoV-2                       | <i>Sarbecovirus</i> | Wuhan-Hu-1     | <i>Homo sapiens</i>           | 01/2020 | Wu et al.           |
